# Supplementary material for: KMT1 family methyltransferases regulate heterochromatin–nuclear periphery tethering via histone and non‐histone protein methylation
Source: PubMed Central journal article supplement (PMC6501005; doi:10.15252/embr.201643260), 2019-03-12

# Source File for Figure 1B: Left Panel

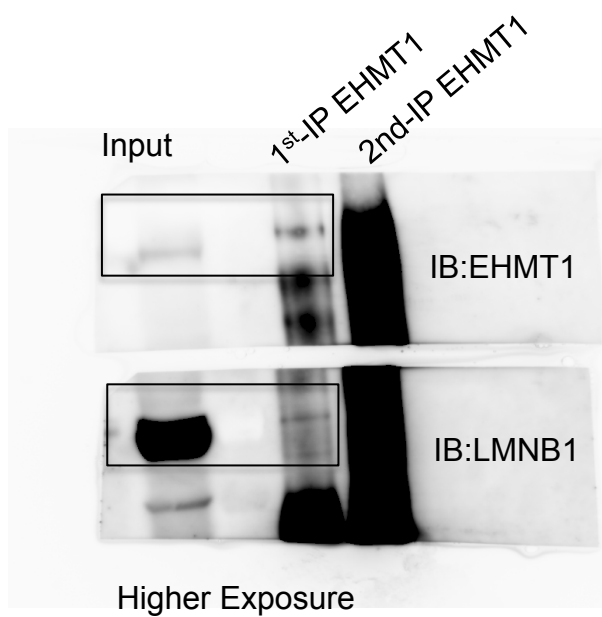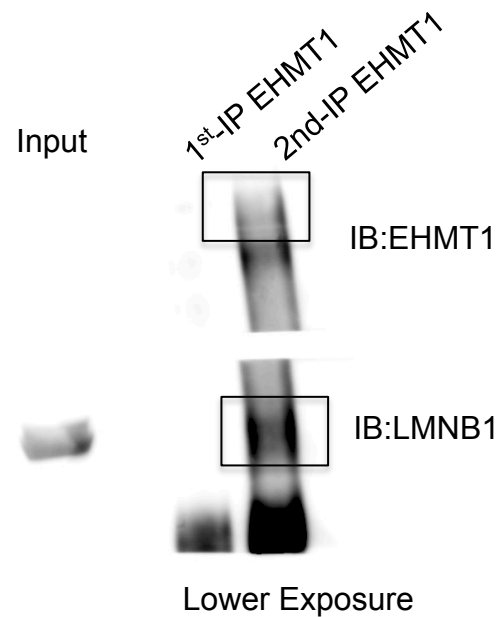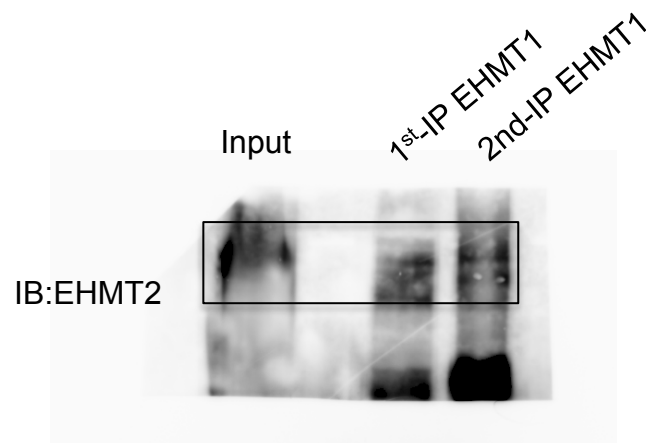

Source File for Figure 1B: Right Panel

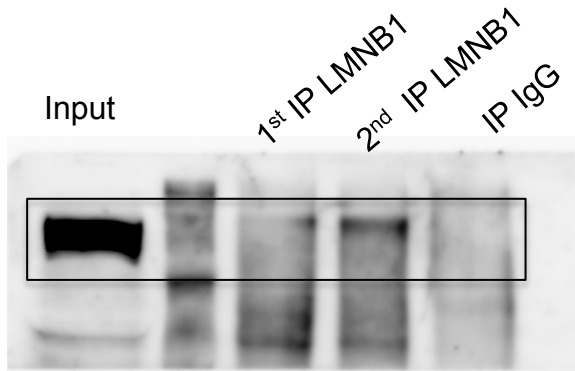

IB: EHMT1

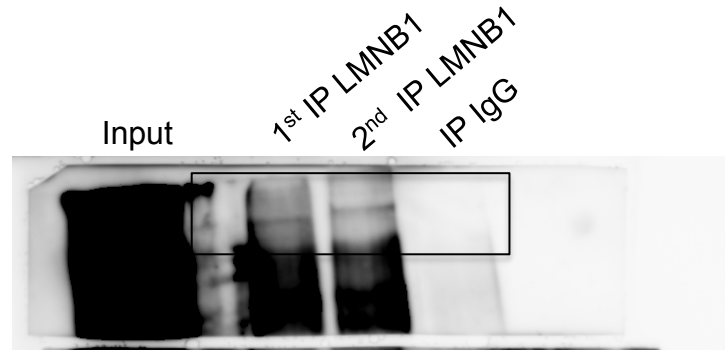

IB: EHMT2 (Higher Exposure)

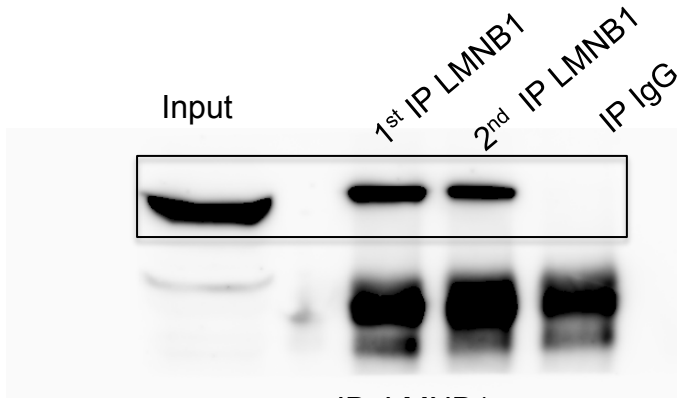

IB: LMNB1

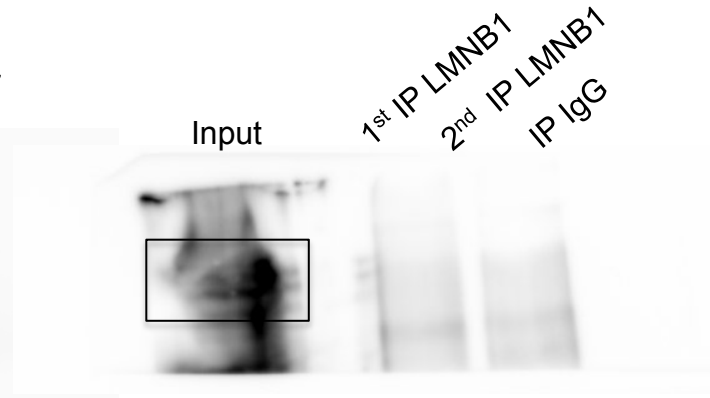

IB: EHMT2 (Lower Exposure)

Source File for Figure 5J and 5K

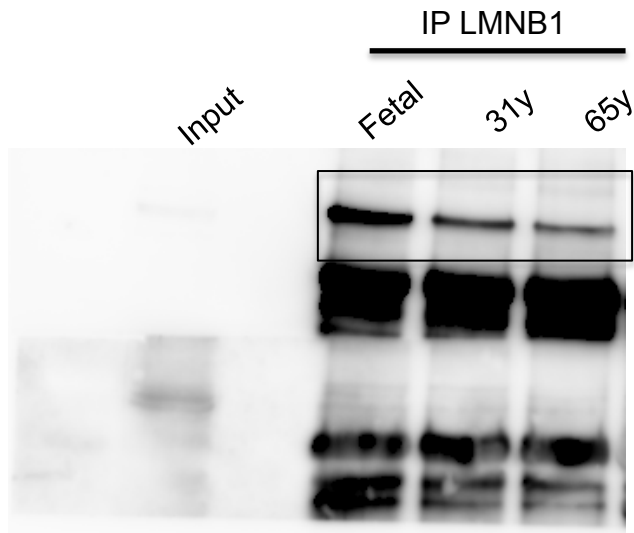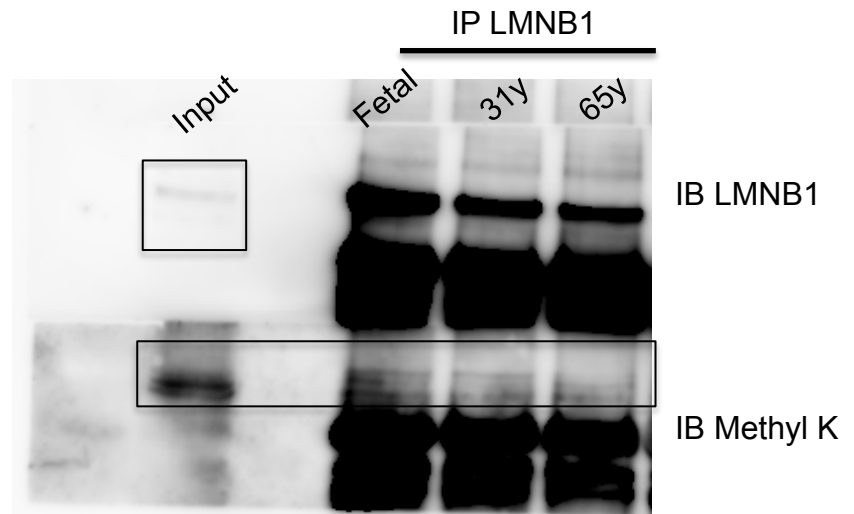

Supplement: EMBR-20-e43260-s010.pdf [file EMBR-20-e43260-s010.pdf]
